# Supplementary material for: Fabrication of a novel electrochemical sensing platform based on a core–shell nano-structured/molecularly imprinted polymer for sensitive and selective determination of ephedrine
Source: Royal Society of Chemistry journal article supplement (doi:10.1039/c6ra09488k), 2016-01-01
Supplement: c6ra09488k1.pdf [file c6ra09488k1.pdf]

## "Supplementary Information"

### Fabrication of a novel electrochemical sensing platform based on core-shell nano-structured/molecularly imprinted polymer for sensitive and selective determination of ephedrine

H. Bagheri,<sup>a,\*</sup> N. Pajooheshpour,<sup>b</sup> A. Afkhami,<sup>c</sup> and H. Khoshshafar<sup>d</sup>

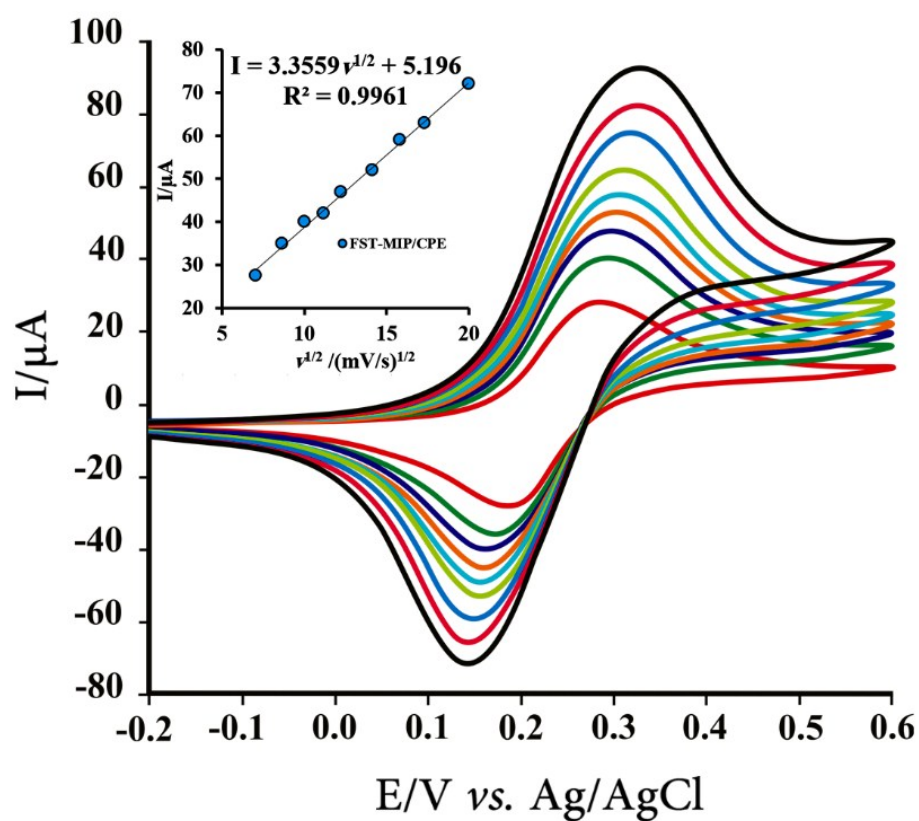

Fig. S1. Cyclic voltammograms of FST-MIP/CPE in  $1.0 \times 10^{-3} \text{ mol L}^{-1} \text{ K}_4[\text{Fe}(\text{CN})_6]$  and 0.1 M KCl at different scan rate (50-350  $\text{mV s}^{-1}$  from bottom to top).

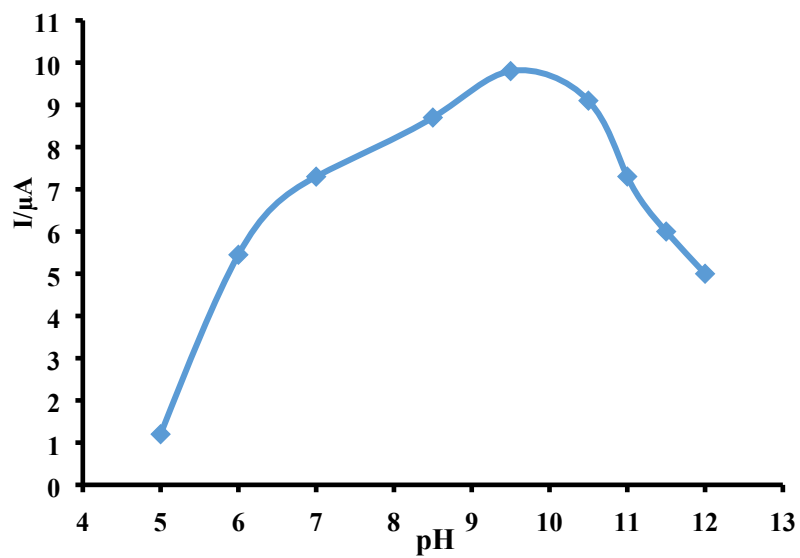

Fig. S2. Optimization of pH for EP accumulation in the FST-MIP/CPE. EP  $1 \mu\text{mol L}^{-1}$ , extraction time=6 mins. Electrochemical measurement in B-R buffer solution (pH=10.5).

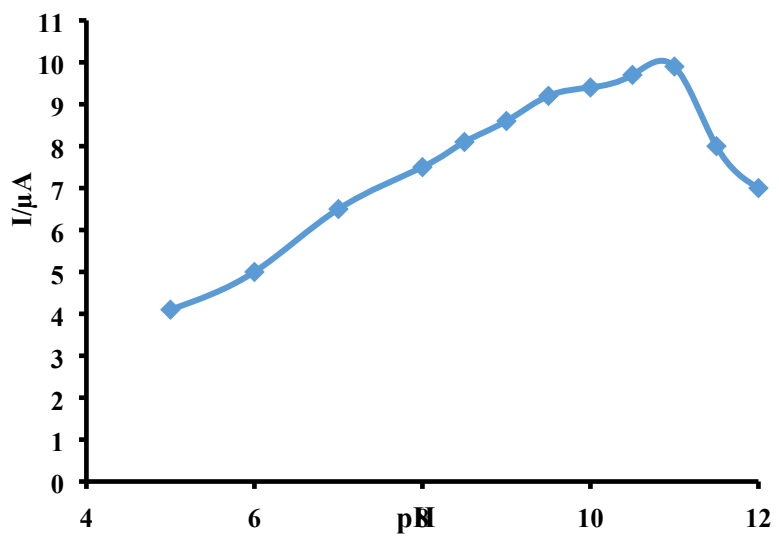

Fig. S3. Influence of pH on electrochemical measurement of  $1 \mu\text{mol L}^{-1}\text{EP}$ . Accumulation pH=9.5.
